# Supplementary material
Source: Springer Nature journal article supplement (https://www.springermedizin.de/resource/supplementary/12987_2013_89_MOESM5_ESM.pdf/9680364)

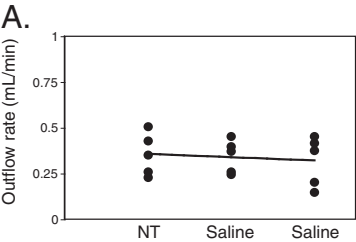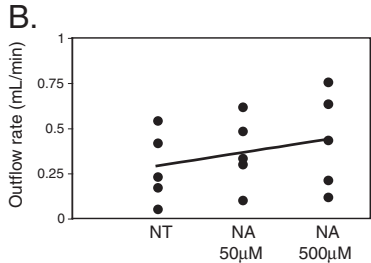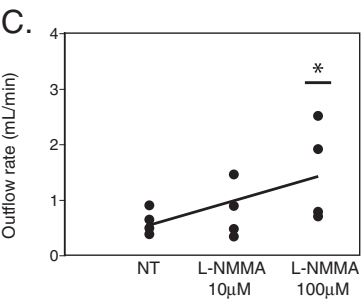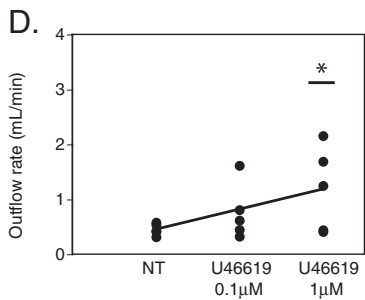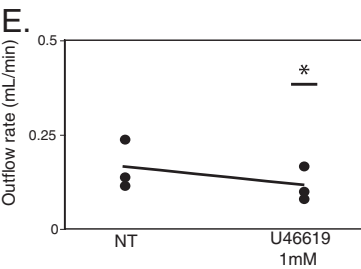

Supplement: MOESM5 [file 9680364]
